## Concise report

## Impact of discordance between patient's and evaluator's global assessment on treatment outcomes in 14 868 patients with spondyloarthritis

Brigitte Michelsen <sup>1,2,3</sup>, Lykke Midtbøll Ørnbjerg<sup>1,4</sup>, Tore K. Kvien<sup>3</sup>, Karel Pavelka<sup>5</sup>, Michael J. Nissen<sup>6</sup>, Dan Nordström<sup>7</sup>, Maria José Santos <sup>8</sup>, Suleyman Serdar Koca<sup>9</sup>, Johan Askling<sup>10</sup>, Ziga Rotar<sup>11</sup>, Bjorn Gudbjornsson<sup>12</sup>, Catalin Codreanu<sup>13</sup>, Anne Gitte Loft<sup>4,14</sup>, Eirik Klami Kristianslund<sup>4</sup>, Herman F. Mann<sup>5</sup>, Adrian Ciurea <sup>15</sup>, Kari K. Eklund<sup>16</sup>, Elsa Vieira-Sousa<sup>8</sup>, Ayten Yazici<sup>17</sup>, Lennart Jacobsson<sup>18</sup>, Matija Tomšič<sup>11</sup>, Thorvardur Jón Löve<sup>19</sup>, Ruxandra Ionescu<sup>13</sup>, I. E. van der Horst-Bruinsma<sup>20</sup>, Florenzo Iannone <sup>21</sup>, Manuel Pombo-Suarez<sup>22</sup>, Gareth T. Jones <sup>23</sup>, Lise Hejl Hyldstrup<sup>1</sup>, Niels Steen Krogh<sup>24</sup>, Merete Lund Hetland<sup>1,25,\*</sup> and Mikkel Østergaard<sup>1,25,\*</sup>

## Abstract

**Objectives.** To assess the impact of 'patient's minus evaluator's global assessment of disease activity' ( $\Delta$ PEG) at treatment initiation on retention and remission rates of TNF inhibitors (TNFi) in psoriatic arthritis (PsA) and axial spondyloarthritis (axSpA) patients across Europe.

**Methods.** Real-life data from PsA and axSpA patients starting their first TNFi from 11 countries in the European Spondyloarthritis Research Collaboration Network were pooled. Retention rates were compared by Kaplan–Meier analyses with log-rank test and by Cox regression, and remission rates by  $\chi^2$  test and by logistic regression across quartiles of baseline  $\Delta$ PEG, separately in female and male PsA and axSpA patients.

**Results.** We included 14 868 spondyloarthritis (5855 PsA, 9013 axSpA) patients. Baseline  $\Delta$ PEG was negatively associated with 6/12/24-months' TNFi retention rates in female and male PsA and axSpA patients ( $P < 0.001$ ), with 6/12/24-months' BASDAI  $< 2$  ( $P \leq 0.002$ ) and ASDAS  $< 1.3$  ( $P \leq 0.005$ ) in axSpA patients, and with DAS28CRP(4)  $< 2.6$  ( $P \leq 0.04$ ) and DAPSA28  $\leq 4$  ( $P \leq 0.01$ ), but not DAS28CRP(3)  $< 2.6$  ( $P \geq 0.13$ ) in PsA patients, with few exceptions on remission rates. Retention and remission rates were overall lower in female than male patients.

<sup>1</sup>EuroSpA Coordinating Center, Copenhagen Center for Arthritis Research (COPECARE), Center for Rheumatology and Spine Diseases, Centre for Head and Orthopaedics, Rigshospitalet, Glostrup, Denmark, <sup>2</sup>Division of Rheumatology, Department of Medicine, Hospital of Southern Norway Trust, Kristiansand, <sup>3</sup>Department of Rheumatology, Diakonhjemmet Hospital, Oslo, Norway, <sup>4</sup>DANBIO Registry, Center for Rheumatology and Spine Diseases, Centre for Head and Orthopaedics, Rigshospitalet, Glostrup, Denmark, <sup>5</sup>Institute of Rheumatology and Department of Rheumatology, 1st Faculty of Medicine, Charles University, Prague, Czech Republic, <sup>6</sup>Department of Rheumatology, Geneva University Hospital, Geneva, Switzerland, <sup>7</sup>ROB-FIN Registry, Helsinki University and Helsinki University Hospital, Helsinki, Finland, <sup>8</sup>Reuma.pt Registry and Instituto de Medicina Molecular, Faculdade de Medicina, Universidade de Lisboa, Portugal, <sup>9</sup>TURKBIO Registry and Division of Rheumatology, School of Medicine, Firat University, Elazig, Turkey, <sup>10</sup>Clinical Epidemiology Division, Department of Medicine Solna, Karolinska Institutet, Stockholm, Sweden, <sup>11</sup>BioRx.si and the Department of Rheumatology, University Medical Centre Ljubljana, Ljubljana, Slovenia, <sup>12</sup>Centre for Rheumatology Research (ICEBIO), University Hospital and Faculty of Medicine, University of Iceland, Reykjavik, Iceland, <sup>13</sup>Center of Rheumatic Diseases, University of Medicine and Pharmacy 'Carol Davila', Bucharest, Romania, <sup>14</sup>Department of Rheumatology, Aarhus University Hospital, Aarhus, Denmark, <sup>15</sup>Department of Rheumatology, University Hospital Zurich, Zurich, Switzerland,

<sup>16</sup>Inflammation Center, Department of Rheumatology, Helsinki University Hospital, Helsinki, Finland, <sup>17</sup>TURKBIO Registry and Division of Rheumatology, School of Medicine, Kocaeli University, Izmit, Turkey, <sup>18</sup>Department of Rheumatology and Inflammation Research, Sahlgrenska Academy, University of Gothenburg, Gothenburg, Sweden, <sup>19</sup>University of Iceland, Faculty of Medicine, Landspítali University Hospital, Reykjavik, Iceland, <sup>20</sup>Department of Rheumatology & Immunology Center (ARC), Amsterdam University Medical Centres, Location VU University Medical Center, Amsterdam, the Netherlands, <sup>21</sup>GiSEA Registry, Rheumatology Unit – DETO, University of Bari, Italy, <sup>22</sup>Rheumatology Service, Hospital Clinico Universitario, Santiago de Compostela, Spain, <sup>23</sup>Epidemiology Group, School of Medicine, Medical Science and Nutrition, University of Aberdeen, Aberdeen, UK, <sup>24</sup>Zitelab Aps and <sup>25</sup>Department of Clinical Medicine, University of Copenhagen, Copenhagen, Denmark

Submitted 13 August 2019; accepted 6 December 2019

\*Merete Lund Hetland and Mikkel Østergaard contributed equally to this work.

Correspondence to: Brigitte Michelsen, EuroSpA Coordinating Center, Copenhagen Center for Arthritis Research (COPECARE), Center for Rheumatology and Spine Diseases, Centre for Head and Orthopaedics, Rigshospitalet, Valdemar Hansens Vej 17, 2600 Glostrup, Denmark.  
E-mail: brigitte.michelsen@regionh.dk

**Conclusion.** High baseline patient's compared with evaluator's global assessment was associated with lower 6/12/24-months' remission as well as retention rates of first TNFi in both PsA and axSpA patients. These results highlight the importance of discordance between patient's and evaluator's perspective on disease outcomes.

**Key words:** axial spondyloarthritis, psoriatic arthritis, TNF inhibitors, treatment outcomes

### Rheumatology key messages

- Discordance between patient's and evaluator's global assessment negatively impacts retention and remission of TNFi in SpA.
- Remission criteria that objectively reflect disease activity should be included in patients with high discordance.
- TNFi retention and remission rates are overall lower for female than male patients with SpA.

## Introduction

Discordance between patient's global assessment and physician's/evaluator's global assessment of disease activity at baseline is common [1, 2] and may reduce the likelihood of remission following tumour necrosis factor inhibitor (TNFi) treatment in patients with psoriatic arthritis (PsA) [2]. However, to our knowledge, the impact of such discordance on retention rates of TNFi treatment in PsA patients and on TNFi retention and remission rates in axial spondyloarthritis (axSpA) patients remains unexplored. Furthermore, it remains unknown whether the impact of such discordance on retention and remission rates may be influenced by gender in patients with spondyloarthritis.

In this study we aimed to assess the impact of baseline 'patient's minus evaluator's global assessment of disease activity' ( $\Delta$ PEG), on retention and remission rates of first-time TNFi separately in female and male patients with PsA and axSpA across Europe.

## Patients and methods

### Patients

Anonymized data from PsA and axSpA patients who started their first TNFi between 2000 and 2017 were pooled from 11 registries participating in the European Spondyloarthritis Research Collaboration Network (EuroSpA) [3]: DANBIO (Denmark), NOR-DMARD (Norway), ATTRA (Czech Republic), SCQM (Switzerland), ROB-FIN (Finland), Reuma.pt (Portugal), TURKBIO (Turkey), ARTIS (Sweden), biorx.si (Slovenia), ICEBIO (Iceland) and RRBR (Romania). The study was approved by the respective national Data Protection Agencies and Research Ethical Committees according to legal regulatory requirements in the participating countries and was performed in accordance with the Declaration of Helsinki.

### Assessments

Assessments included demographics, time since diagnosis, start and stop dates of first TNFi, visual analogue scales (0–100) of patient's and evaluator's global assessments (except for SCQM, biorx.si and RRBR

using a 0–10 Numeric Rating Scale) and CRP. Furthermore, in PsA patients, assessments at baseline (pre-treatment), 6, 12 and 24 months included 28 tender and swollen joint counts, 28-joint Disease Activity Score *with* CRP and patient's global assessment (DAS28CRP(4)) [4], DAS28CRP *without* patients' global assessment (DAS28CRP(3)) [4] as well as 28-joint Disease Activity Index for Psoriatic Arthritis (DAPSA28) [5], and in axSpA patients BASDAI [6] and Ankylosing Spondylitis Disease Activity Score (ASDAS) [7].

### Statistics

All analyses were conducted separately for female and male PsA and axSpA patients. Retention rates after 6-, 12- and 24-months' treatment with first TNFi were assessed by Kaplan–Meier analyses, with comparison between baseline  $\Delta$ PEG quartiles by log-rank test. The impact of baseline  $\Delta$ PEG quartiles on 6-, 12- and 24-months' retention rates was also explored with Cox regression analyses, adjusted for age, time since diagnosis and current smoking (yes/no). Proportions of axSpA patients achieving BASDAI remission (defined in two ways, either as  $<2$ , or as  $<2$  with CRP  $<7$ mg/l [8]) and ASDAS inactive disease ( $<1.3$ ) [9], as well as proportions of PsA patients in DAS28CRP(4) remission ( $<2.6$ ) [10], DAS28CRP(3) remission ( $<2.6$ ) [4] and DAPSA28 remission ( $\leq 4$ ) [5] after 6-, 12- and 24-months' treatment were compared across  $\Delta$ PEG quartiles by  $\chi^2$  test. The impact of baseline  $\Delta$ PEG quartiles on 6-, 12- and 24-months' remission rates was also explored in logistic regression models adjusted for age, time since diagnosis and current smoking (yes/no). Statistical analyses were performed with R version 3.4.3 and SPSS version 25. All analyses were available case analyses. No data imputation was performed.

## Results

A total of 14 868 spondyloarthritis patients were included, thereof 5855 PsA and 9013 axSpA patients. For PsA patients, mean (s.d.) age of women ( $n=2988$ ) and men ( $n=2867$ ) were 49.3 (12.5) and 47.4 (11.7)

years, respectively, time since diagnosis was 6.6 (7.3) and 6.7 (7.2) years and median (25–75 percentiles) baseline  $\Delta$ PEG 17 (0–38) and 10 (0–30), respectively, and for axSpA patients mean (s.d.) age of women ( $n = 3639$ ) and men ( $n = 5374$ ) was 42.7 (12.0) and 41.7 (12.0) years, respectively, and time since diagnosis was 5.1 (7.4) and 6.9 (8.7) years and median (25–75 percentiles) baseline  $\Delta$ PEG 20 (3–42) and 15 (0–37).

#### Impact of baseline $\Delta$ PEG on TNFi retention

TNFi retention rates at 6-, 12- and 24-months' follow-up were significantly lower for higher quartiles of  $\Delta$ PEG both in female and male PsA and axSpA patients (Table 1, Fig. 1).

Adjustment of the analyses for age, time since diagnosis and smoking consistently showed lower TNFi retention rates for higher quartiles of  $\Delta$ PEG ( $P \leq 0.01$ ). Findings for third and fourth  $\Delta$ PEG quartiles in axSpA patients were similar (Supplementary Fig. S1, available at *Rheumatology* online).

#### Impact of baseline $\Delta$ PEG on achievement of remission

Proportions of PsA patients achieving DAPSA28 and DAS28(4)CRP—but not DAS28(3)CRP remission—and axSpA patients achieving BASDAI remission and ASDAS inactive disease were significantly lower for higher quartiles of baseline  $\Delta$ PEG both in women and men after 6-, 12- and 24-months' follow-up, except for 12-months'

DAS28(4)CRP remission in men and 24-months' DAS28(3)CRP remission in women (Table 1). Adjustment for age, time since diagnosis and smoking in a logistic regression model did not change the significance of the above-mentioned patterns, with the following exceptions: 6- and 12-months' ASDAS inactive disease in female and 6-months' ASDAS inactive disease in male axSpA patients showed consistently lower point estimates for higher  $\Delta$ PEG quartiles, but did not reach statistical significance (Supplementary Tables S1a and S1b, available at *Rheumatology* online).

## Discussion

This longitudinal observational study including data from 11 European registries highlights the negative consequences of high baseline discordance between patient's and evaluator's global assessment (i.e. high baseline patient's compared with evaluator's global assessment,  $\Delta$ PEG) for TNFi treatment outcomes in patients with PsA and axSpA. The higher the baseline  $\Delta$ PEG, the lower were 6-, 12- and 24-months' TNFi drug retention as well as remission rates in both male and female PsA and axSpA patients, with few exceptions regarding remission rates. The study also highlights the importance of choice of remission criteria; baseline  $\Delta$ PEG was negatively associated with achievement of 6-, 12- and 24-months' DAS28CRP(4) remission, which includes patient's global, but not with DAS28CRP(3) remission, which excludes patient's global. This is to our knowledge the first study

Fig. 1 TNFi retention rates across  $\Delta$ PEG quartiles, censored by 104 weeks

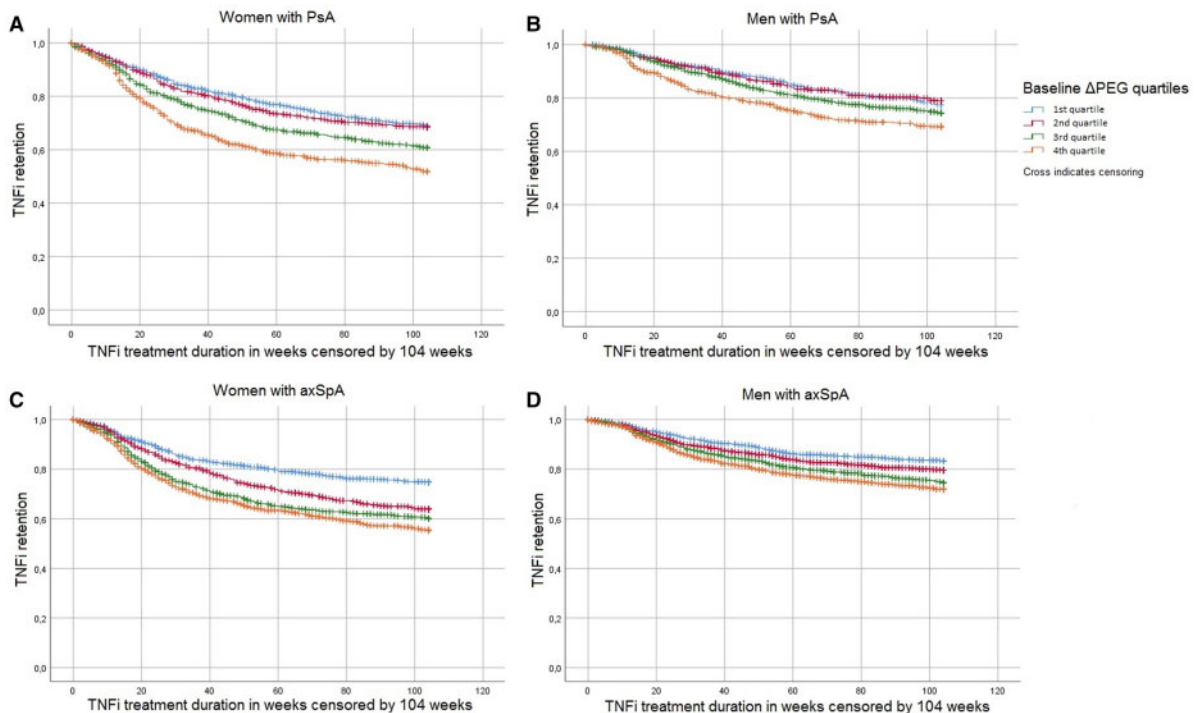

(A) Women with PsA; (B) men with PsA; (C) women with axSpA; (D) men with axSpA.

**TABLE 1** Retention and remission rates of first TNFi in psoriatic arthritis and axial spondyloarthritis patients

|                                                                                                              |         | Psoriatic arthritis patients (n = 5855)                                            |                                      |                                       |                                        |                                         |                                     |                                       |                                        |         |  |
|--------------------------------------------------------------------------------------------------------------|---------|------------------------------------------------------------------------------------|--------------------------------------|---------------------------------------|----------------------------------------|-----------------------------------------|-------------------------------------|---------------------------------------|----------------------------------------|---------|--|
|                                                                                                              |         | Women (n = 2988)                                                                   |                                      |                                       |                                        |                                         | Men (n = 2867)                      |                                       |                                        |         |  |
| TNFi retention rates                                                                                         | P-value | Retention rates (%; 95% CI) of first TNFi compared across baseline ΔPEEG quartiles |                                      |                                       |                                        |                                         |                                     |                                       |                                        |         |  |
|                                                                                                              |         | 1st ΔPEEG quartile (-100 to 0) (n=815)                                             | 2nd ΔPEEG quartile (1 to 17) (n=694) | 3rd ΔPEEG quartile (18 to 38) (n=739) | 4th ΔPEEG quartile (39 to 100) (n=740) | 1st ΔPEEG quartile (-100 to -1) (n=648) | 2nd ΔPEEG quartile (0 to 9) (n=683) | 3rd ΔPEEG quartile (10 to 30) (n=865) | 4th ΔPEEG quartile (31 to 100) (n=671) | P-value |  |
| 6 months                                                                                                     | <0.001  | 87% (85, 90%)<br>n=815                                                             | 85% (82, 88%)<br>n=694               | 81% (78, 84%)<br>n=739                | 74% (71, 77%)<br>n=740                 | 93% (91, 95%)<br>n=648                  | 93% (91, 95%)<br>n=683              | 92% (90, 93%)<br>n=865                | 86% (83, 89%)<br>n=671                 | <0.001  |  |
| 12 months                                                                                                    | <0.001  | 79% (76, 82%)<br>n=815                                                             | 76% (73, 79%)<br>n=694               | 70% (67, 74%)<br>n=739                | 61% (57, 65%)<br>n=740                 | 88% (85, 90%)<br>n=648                  | 86% (84, 89%)<br>n=683              | 83% (80, 85%)<br>n=865                | 78% (75, 81%)<br>n=671                 | <0.001  |  |
| 24 months                                                                                                    | <0.001  | 69% (66, 72%)<br>n=815                                                             | 69% (65, 72%)<br>n=694               | 61% (57, 65%)<br>n=739                | 52% (48, 56%)<br>n=740                 | 77% (74, 81%)<br>n=648                  | 79% (76, 82%)<br>n=683              | 74% (71, 78%)<br>n=865                | 69% (66, 73%)<br>n=671                 | <0.001  |  |
| DAPSA28 remission (≤4)                                                                                       |         |                                                                                    |                                      |                                       |                                        |                                         |                                     |                                       |                                        |         |  |
| Proportions, % (95%CI), of patients achieving DAPSA28 remission compared across baseline ΔPEEG quartiles     |         |                                                                                    |                                      |                                       |                                        |                                         |                                     |                                       |                                        |         |  |
|                                                                                                              | P-value | 1st ΔPEEG quartile (-100 to 0) (n=325)                                             | 2nd ΔPEEG quartile (1 to 17) (n=290) | 3rd ΔPEEG quartile (18 to 38) (n=328) | 4th ΔPEEG quartile (39 to 100) (n=329) | 1st ΔPEEG quartile (-100 to -1) (n=295) | 2nd ΔPEEG quartile (0 to 9) (n=300) | 3rd ΔPEEG quartile (10 to 30) (n=382) | 4th ΔPEEG quartile (31 to 100) (n=309) | P-value |  |
| 6 months                                                                                                     | <0.001  | 21% (17, 25%)<br>n=420                                                             | 24% (19, 28%)<br>n=413               | 12% (9, 15%)<br>n=432                 | 12% (9, 15%)<br>n=457                  | 42% (37, 47%)<br>n=339                  | 38% (33, 42%)<br>n=399              | 30% (26, 34%)<br>n=465                | 27% (23, 32%)<br>n=412                 | <0.001  |  |
| 12 months                                                                                                    | 0.002   | 23% (18, 27%)<br>n=391                                                             | 27% (22, 32%)<br>n=352               | 16% (13, 20%)<br>n=393                | 14% (11, 17%)<br>n=400                 | 41% (36, 46%)<br>n=333                  | 40% (35, 45%)<br>n=359              | 34% (29, 38%)<br>n=455                | 29% (25, 34%)<br>n=383                 | 0.002   |  |
| 24 months                                                                                                    | <0.001  | 27% (23, 32%)<br>n=325                                                             | 27% (22, 32%)<br>n=290               | 19% (15, 23%)<br>n=328                | 13% (9, 17%)<br>n=329                  | 46% (40, 51%)<br>n=295                  | 42% (36, 48%)<br>n=300              | 33% (28, 37%)<br>n=382                | 28% (23, 33%)<br>n=309                 | <0.001  |  |
| DAS28(4)CRP remission (<2.6)                                                                                 |         |                                                                                    |                                      |                                       |                                        |                                         |                                     |                                       |                                        |         |  |
| Proportions, % (95%CI), of patients achieving DAS28(4)CRP remission compared across baseline ΔPEEG quartiles |         |                                                                                    |                                      |                                       |                                        |                                         |                                     |                                       |                                        |         |  |
|                                                                                                              | P-value | 1st ΔPEEG quartile (-100 to 0) (n=358)                                             | 2nd ΔPEEG quartile (1 to 17) (n=323) | 3rd ΔPEEG quartile (18 to 38) (n=349) | 4th ΔPEEG quartile (39 to 100) (n=337) | 1st ΔPEEG quartile (-100 to -1) (n=324) | 2nd ΔPEEG quartile (0 to 9) (n=330) | 3rd ΔPEEG quartile (10 to 30) (n=408) | 4th ΔPEEG quartile (31 to 100) (n=316) | P-value |  |
| 6 months                                                                                                     | 0.04    | 51% (47, 56%)<br>n=492                                                             | 48% (44, 53%)<br>n=464               | 39% (34, 43%)<br>n=460                | 36% (32, 41%)<br>n=465                 | 63% (58, 68%)<br>n=378                  | 67% (63, 71%)<br>n=458              | 59% (55, 63%)<br>n=506                | 59% (54, 63%)<br>n=419                 | 0.04    |  |
| 12 months                                                                                                    | 0.21    | 53% (48, 57%)<br>n=449                                                             | 53% (48, 58%)<br>n=397               | 43% (38, 47%)<br>n=419                | 38% (33, 43%)<br>n=409                 | 68% (63, 71%)<br>n=370                  | 69% (63, 71%)<br>n=404              | 63% (55, 63%)<br>n=492                | 65% (64, 63%)<br>n=389                 | 0.21    |  |
| 24 months                                                                                                    | 0.007   | 58% (53, 63%)<br>n=358                                                             | 58% (52, 63%)<br>n=323               | 47% (42, 53%)<br>n=349                | 37% (32, 43%)<br>n=337                 | 69% (64, 74%)<br>n=324                  | 72% (67, 77%)<br>n=330              | 64% (59, 69%)<br>n=408                | 60% (55, 66%)<br>n=316                 | 0.007   |  |
| DAS28(3)CRP remission (<2.6)                                                                                 |         |                                                                                    |                                      |                                       |                                        |                                         |                                     |                                       |                                        |         |  |
| Proportions, % (95%CI), of patients achieving DAS28(3)CRP remission compared across baseline ΔPEEG quartiles |         |                                                                                    |                                      |                                       |                                        |                                         |                                     |                                       |                                        |         |  |
|                                                                                                              | P-value | 1st ΔPEEG quartile (-100 to 0) (n=374)                                             | 2nd ΔPEEG quartile (1 to 17) (n=469) | 3rd ΔPEEG quartile (18 to 38) (n=469) | 4th ΔPEEG quartile (39 to 100) (n=472) | 1st ΔPEEG quartile (-100 to -1) (n=381) | 2nd ΔPEEG quartile (0 to 9) (n=411) | 3rd ΔPEEG quartile (10 to 30) (n=503) | 4th ΔPEEG quartile (31 to 100) (n=425) | P-value |  |
| 6 months                                                                                                     | 0.28    | 52% (48, 57%)<br>n=507                                                             | 53% (48, 57%)<br>n=469               | 47% (43, 52%)<br>n=469                | 48% (43, 52%)<br>n=472                 | 65% (60, 70%)<br>n=386                  | 69% (64, 73%)<br>n=467              | 64% (60, 68%)<br>n=517                | 68% (64, 73%)<br>n=426                 | 0.28    |  |
| 12 months                                                                                                    | 0.77    | 54% (50, 59%)<br>n=471                                                             | 57% (52, 61%)<br>n=409               | 53% (48, 57%)<br>n=435                | 50% (45, 55%)<br>n=420                 | 70% (66, 75%)<br>n=381                  | 72% (67, 76%)<br>n=411              | 69% (65, 73%)<br>n=503                | 72% (68, 76%)<br>n=396                 | 0.77    |  |
| 24 months                                                                                                    | 0.32    | 61% (56, 66%)<br>n=374                                                             | 60% (55, 65%)<br>n=336               | 55% (50, 60%)<br>n=367                | 52% (46, 57%)<br>n=347                 | 74% (69, 79%)<br>n=331                  | 76% (71, 80%)<br>n=341              | 70% (66, 74%)<br>n=425                | 73% (69, 78%)<br>n=323                 | 0.32    |  |

(continued)

TABLE 1 Continued

| TNFi retention rates   | Axial spondyloarthritis patients (n=9013)                                                                    |                                     |                                      |                                       |         |                                         |                                      |                                       |                                        |         |
|------------------------|--------------------------------------------------------------------------------------------------------------|-------------------------------------|--------------------------------------|---------------------------------------|---------|-----------------------------------------|--------------------------------------|---------------------------------------|----------------------------------------|---------|
|                        | Women (n = 3639)                                                                                             |                                     |                                      |                                       |         | Men (n = 5374)                          |                                      |                                       |                                        |         |
|                        | Retention rates of first TNFi (%; 95%CI) compared across baseline ΔPEQ quartiles                             |                                     |                                      |                                       |         |                                         |                                      |                                       |                                        |         |
|                        | 1st ΔPEQ quartile (-100 to 2) (n=908)                                                                        | 2nd ΔPEQ quartile (3 to 20) (n=915) | 3rd ΔPEQ quartile (21 to 42) (n=907) | 4th ΔPEQ quartile (43 to 100) (n=909) | P-value | 1st APEG quartile (-100 to -1) (n=1220) | 2nd APEG quartile (0 to 15) (n=1487) | 3rd APEG quartile (16 to 37) (n=1338) | 4th APEG quartile (38 to 100) (n=1329) | P-value |
| 6 months               | 88% (86, 90%)<br>n=908                                                                                       | 84% (82, 87%)<br>n=915              | 78% (75, 81%)<br>n=907               | 76% (73, 79%)<br>n=909                | <0.001  | 94% (92, 95%)<br>n=1220                 | 91% (89, 92%)<br>n=1487              | 89% (88, 91%)<br>n=1338               | 87% (85, 89%)<br>n=1329                | <0.001  |
| 12 months              | 81% (78, 84%)<br>n=908                                                                                       | 74% (71, 77%)<br>n=915              | 67% (64, 70%)<br>n=907               | 64% (61, 68%)<br>n=909                | <0.001  | 88% (86, 90%)<br>n=1220                 | 86% (84, 88%)<br>n=1487              | 83% (81, 85%)<br>n=1338               | 79% (77, 82%)<br>n=1329                | <0.001  |
| 24 months              | 75% (72, 78%)<br>n=908                                                                                       | 64% (61, 67%)<br>n=915              | 60% (57, 64%)<br>n=907               | 55% (52, 59%)<br>n=909                | <0.001  | 83% (81, 86%)<br>n=1220                 | 80% (77, 82%)<br>n=1487              | 75% (72, 77%)<br>n=1338               | 72% (69, 75%)<br>n=1329                | <0.001  |
| ASDAS<1.3              | Proportions, % (95%CI), of patients achieving ASDAS<1.3 compared across baseline ΔPEQ quartiles              |                                     |                                      |                                       |         |                                         |                                      |                                       |                                        |         |
|                        | 1st ΔPEQ quartile (-100 to 2) (n=908)                                                                        | 2nd ΔPEQ quartile (3 to 20) (n=915) | 3rd ΔPEQ quartile (21 to 42) (n=907) | 4th ΔPEQ quartile (43 to 100) (n=909) | P-value | 1st APEG quartile (-100 to -1) (n=1220) | 2nd APEG quartile (0 to 15) (n=1487) | 3rd APEG quartile (16 to 37) (n=1338) | 4th APEG quartile (38 to 100) (n=1329) | P-value |
| 6 months               | 28% (23, 33%)<br>n=313                                                                                       | 24% (19, 28%)<br>n=293              | 23% (18, 27%)<br>n=289               | 17% (14, 21%)<br>n=449                | 0.005   | 40% (36, 45%)<br>n=507                  | 41% (36, 45%)<br>n=527               | 34% (30, 38%)<br>n=446                | 31% (27, 35%)<br>n=625                 | 0.001   |
| 12 months              | 27% (22, 33%)<br>n=266                                                                                       | 23% (18, 29%)<br>n=221              | 23% (18, 29%)<br>n=233               | 15% (12, 19%)<br>n=370                | 0.002   | 41% (37, 46%)<br>n=427                  | 41% (37, 46%)<br>n=458               | 33% (28, 37%)<br>n=403                | 31% (27, 35%)<br>n=508                 | 0.001   |
| 24 months              | 29% (23, 35%)<br>n=225                                                                                       | 24% (18, 30%)<br>n=197              | 27% (21, 33%)<br>n=205               | 16% (11, 20%)<br>n=284                | 0.002   | 45% (40, 50%)<br>n=369                  | 41% (36, 45%)<br>n=406               | 39% (33, 44%)<br>n=335                | 31% (27, 35%)<br>n=444                 | 0.001   |
| BASDAI<2               | Proportions, % (95%CI), of patients achieving BASDAI<2 compared across baseline ΔPEQ quartiles               |                                     |                                      |                                       |         |                                         |                                      |                                       |                                        |         |
|                        | 1st ΔPEQ quartile (-100 to 2) (n=908)                                                                        | 2nd ΔPEQ quartile (3 to 20) (n=915) | 3rd ΔPEQ quartile (21 to 42) (n=907) | 4th ΔPEQ quartile (43 to 100) (n=909) | P-value | 1st APEG quartile (-100 to -1) (n=1220) | 2nd APEG quartile (0 to 15) (n=1487) | 3rd APEG quartile (16 to 37) (n=1338) | 4th APEG quartile (38 to 100) (n=1329) | P-value |
| 6 months               | 44% (39, 49%)<br>n=517                                                                                       | 31% (28, 35%)<br>n=525              | 27% (23, 31%)<br>n=535               | 26% (22, 29%)<br>n=625                | <0.001  | 57% (54, 61%)<br>n=796                  | 50% (47, 53%)<br>n=955               | 44% (41, 47%)<br>n=866                | 40% (37, 43%)<br>n=921                 | <0.001  |
| 12 months              | 45% (41, 50%)<br>n=487                                                                                       | 32% (27, 36%)<br>n=479              | 29% (24, 33%)<br>n=471               | 24% (21, 28%)<br>n=522                | <0.001  | 59% (55, 62%)<br>n=734                  | 51% (48, 55%)<br>n=892               | 44% (40, 47%)<br>n=812                | 41% (38, 44%)<br>n=833                 | <0.001  |
| 24 months              | 48% (43, 53%)<br>n=385                                                                                       | 33% (28, 38%)<br>n=395              | 30% (25, 34%)<br>n=386               | 21% (17, 25%)<br>n=406                | <0.001  | 60% (56, 63%)<br>n=621                  | 54% (50, 57%)<br>n=759               | 44% (40, 47%)<br>n=665                | 40% (37, 44%)<br>n=686                 | <0.001  |
| BASDAI<2 and CRP<7mg/l | Proportions, % (95%CI), of patients achieving BASDAI<2 and CRP<7mg/l compared across baseline ΔPEQ quartiles |                                     |                                      |                                       |         |                                         |                                      |                                       |                                        |         |
|                        | 1st ΔPEQ quartile (-100 to 2) (n=908)                                                                        | 2nd ΔPEQ quartile (3 to 20) (n=915) | 3rd ΔPEQ quartile (21 to 42) (n=907) | 4th ΔPEQ quartile (43 to 100) (n=909) | P-value | 1st APEG quartile (-100 to -1) (n=1220) | 2nd APEG quartile (0 to 15) (n=1487) | 3rd APEG quartile (16 to 37) (n=1338) | 4th APEG quartile (38 to 100) (n=1329) | P-value |
| 6 months               | 33% (29, 37%)<br>n=527                                                                                       | 23% (20, 27%)<br>n=541              | 21% (18, 24%)<br>n=557               | 20% (17, 23%)<br>n=641                | <0.001  | 43% (40, 47%)<br>n=822                  | 40% (37, 44%)<br>n=973               | 33% (30, 36%)<br>n=885                | 32% (29, 35%)<br>n=927                 | <0.001  |
| 12 months              | 31% (26, 35%)<br>n=466                                                                                       | 21% (18, 25%)<br>n=500              | 21% (17, 24%)<br>n=488               | 17% (14, 20%)<br>n=529                | <0.001  | 45% (42, 49%)<br>n=752                  | 39% (36, 43%)<br>n=905               | 35% (32, 38%)<br>n=824                | 31% (28, 34%)<br>n=828                 | <0.001  |
| 24 months              | 32% (28, 37%)<br>n=404                                                                                       | 23% (19, 27%)<br>n=408              | 24% (19, 28%)<br>n=394               | 16% (13, 20%)<br>n=415                | <0.001  | 46% (42, 50%)<br>n=626                  | 41% (38, 44%)<br>n=772               | 33% (29, 36%)<br>n=672                | 31% (28, 35%)<br>n=681                 | <0.001  |

P-values retention rates: Kaplan-Meier analyses with log-rank test; P-values remission rates:  $\chi^2$  test.

n: numbers available; ASDAS: Ankylosing Spondylitis Disease Activity Score; DAS28(3)CRP: 28-joint disease activity score with CRP and three variables (excluding patient's global); DAS28(4)CRP: 28-joint disease activity score with CRP and four variables (including patient's global); ΔPEQ: patient's minus evaluator's global assessment; TNFi: TNF inhibitor.

to identify  $\Delta$ PEG as an independent predictor of TNFi retention in PsA and axSpA patients. Adjustment for age, time since diagnosis and smoking did not change these findings.

We found higher  $\Delta$ PEG in female than male PsA and axSpA patients, which is in accordance with previous findings in PsA [1, 2]. Retention and remission rates were overall lower for female than male patients. In RA patients, high  $\Delta$ PEG has been found associated with depression, fibromyalgia and polysymptomatic distress, but not with elevated joint inflammation, as evaluated by ultrasonography [11]. In a recent cross-sectional study on PsA patients  $\Delta$ PEG was found to be independently associated with higher fatigue, lower self-perceived coping and impaired social participation [12]. Importantly, patients with elevated  $\Delta$ PEG who do not achieve remission or who have had short treatment adherence to several TNFi may benefit from being identified and offered additional treatment approaches, e.g. social mapping, evaluation of depression and anxiety, and instruction in coping strategies and stress-management [12, 13].

Our study underscores that choice of remission criteria in PsA patients with high  $\Delta$ PEG may have great impact on evaluation of treatment response. DAS28CRP(4) is more commonly used than DAS28CRP(3) in RA as well as PsA. However, in patients with high  $\Delta$ PEG, DAS28CRP(3), which does not include patient's global assessment, may be a more suitable alternative.

Our study is in accordance with a smaller study on PsA patients where  $\Delta$ PEG was found to be a negative predictor for achievement of 3- and 6-months' DAS28ESR(4) and 32-joint DAPSA remission. In that study, however, 12- and 24-months' outcomes, DAS28CRP(3) and retention rates were not evaluated [2].

Limitations of our study include lack of data regarding extra-articular manifestations in PsA patients (e.g. enthesitis, dactylitis and skin involvement) and the use of 28 and not 66/68 joint counts. This may have led to overestimation of remission rates in the PsA patients. Furthermore, DAS28 was developed for RA and not PsA, but has been validated in PsA patients in a clinical trial [14]. Also, there is no consensus as yet on the best cut-off for BASDAI remission in axSpA. Consequently, the two BASDAI remission cut-offs used in this study have not been validated, although one of them was recently used in another study [8]. However, the consistent findings for both these remission definitions as well as for ASDAS inactive disease support the validity and robustness of the results.

The major strength of this study is the longitudinal observational design including >14 000 patients with spondyloarthritis from 11 European countries. To our knowledge, this is the first study to assess the impact of baseline  $\Delta$ PEG on TNFi retention rates in PsA and axSpA patients. It is also the first study to assess the impact of baseline  $\Delta$ PEG for achievement of remission in axSpA patients as well as for achievement of 12- and 24-months' remission in patients with PsA.

In conclusion, high baseline patient's compared with evaluator's global assessment was associated with lower

6-, 12- and 24-months' retention and remission rates of first TNFi in female and male PsA and axSpA patients, except for DAS28CRP(3) remission in PsA. The study highlights the negative impact of high baseline  $\Delta$ PEG on treatment outcomes in PsA and axSpA patients as well as the importance of including remission criteria that objectively reflect disease activity, particularly in the evaluation of PsA patients with high baseline  $\Delta$ PEG.

## Acknowledgements

Novartis Pharma AG and IQVIA for supporting the EuroSpA collaboration.

*Funding:* This work was supported by Novartis. Novartis had no influence on the data collection, statistical analyses, manuscript preparation or decision to submit.

*Disclosure statement:* B.M.: Novartis; L.M.Ø.: Novartis; T.K.K. has received fees for speaking and/or consulting from AbbVie, Biogen, BMS, Celtrion, Egis, Eli Lilly, MSD, Mylan, Novartis, Oktal, Orion Pharma, Hospira/Pfizer, Roche, Sandoz, Sanofi and UCB; K.P.: AbbVie, Roche, Pfizer, Amgen, Sanofi, Egis, BMS, UCB, MSD, Eli Lilly; M.J.N.: Abbvie, Lilly, Pfizer, Novartis; D.N.: AbbVie, BMS, Lilly, MSD, Novartis, Pfizer, Roche, Sandoz, UCB; M.J.S.: Abbvie, Biogen, Roche, Lilly, Pfizer, Novartis; S.S.K.: None; J.A. has entered into agreements with Abbvie, BMS, Lilly, Merck, Pfizer, Roche, Samsung Bioepis, and UCB, mainly for safety monitoring via the Swedish ARTIS system, and received a travel reimbursement from Novartis. Karolinska Institutet has received remuneration for J.A.'s participation in meetings arranged by Pfizer and by Lilly; Z.R.: speaker or consulting fees from Abbvie, Amgen, Biogen, CellGen, Eli-Lilly, Jansen, Medis, MSD, Novartis, Pfizer, and Roche. BioRx.si has received funding for clinical research paid to Društvo za razvoj revmatologije from AbbVie, Celgene, Celtrion, Eli Lilly, Johnson & Johnson, Medis, MSD, Novartis, Pfizer and Roche; B.G.: Amgen, Novartis, Pfizer; C.C.: AbbVie, Amgen, Angellini, Astra Zeneca, BMS, Egis, MSD, Pfizer, Richter, Roche, Sanofi, Servier, Teva, UCB, Zentiva; A.G.L.: Novartis, AbbVie, MSD, Lilly, Roche; E.K.K.: None; H.F.M.: AbbVie, MSD, Novartis, Pfizer, Sanofi; A.C.: AbbVie, Celgene, Eli Lilly, Janssen-Cilag, MSD, Novartis, Pfizer and UCB; K.K.E.: None; E.V.-S.: None; A.Y.: None; L.J.: None; M.T.: Abbvie, Amgen, Biogen, CellGen, Eli-Lilly, Jansen, Medis, MSD, Novartis, Pfizer, and Roche; T.J.L.: None; R.I.: None; I.E.vdH.-B.: AbbVie, MSD, Novartis, Pfizer, Lilly, UCB; F.I.: BMS, Pfizer, Abbvie, UCB, Roche, Celgene, Eli-Lilly, Hospira, Janssen, Merck; M.P.-S.: consultant on Advisory Boards for Abbvie, Gilead, Sanofi. He has received lecture fees from BMS, Gilead, Janssen and Janssen, Lilly, Sanofi. He has received grants from MSD; G.T.J.: None; L.H.H.: Novartis; N.S.K.: None; M.L.H.: Abbvie, Biogen, BMS, CellTrion, MSD, Novartis, Orion, Pfizer, Samsung, UCB; M.Ø.: Abbvie, BMS, Boehringer-Ingelheim, Celgene, Eli-

Lilly, Hospira, Janssen, Merck, Novartis, Orion, Pfizer, Regeneron, Roche, UCB.

## Supplementary data

Supplementary data are available at *Rheumatology* online.

## References

- Lindstrom Egholm C, Krogh NS, Pincus T *et al.* Discordance of global assessments by patient and physician is higher in female than in male patients regardless of the physician's sex: data on patients with rheumatoid arthritis, axial spondyloarthritis, and psoriatic arthritis from the DANBIO Registry. *J Rheumatol* 2015; 42:1781–5.
- Michelsen B, Kristianslund EK, Hammer HB *et al.* Discordance between tender and swollen joint count as well as patient's and evaluator's global assessment may reduce likelihood of remission in patients with rheumatoid arthritis and psoriatic arthritis: data from the prospective multicentre NOR-DMARD study. *Ann Rheum Dis* 2016;76:708–11.
- Ørnberg LM, Brahe CH, Askling J *et al.* Treatment response and drug retention rates in 24, 195 biologic-naïve patients with axial spondyloarthritis initiating TNFi treatment – routine care data from 12 registries in the EuroSpA collaboration. *Ann Rheum Dis* 2019;78: 1536–44.
- van Riel PL. The development of the disease activity score (DAS) and the disease activity score using 28 joint counts (DAS28). *Clin Exp Rheumatol* 2014;32:S-65–74.
- Michelsen B, Sexton J, Smolen JS, Aletaha D *et al.* Can disease activity in patients with psoriatic arthritis be adequately assessed by a modified Disease Activity index for Psoriatic Arthritis (DAPSA) based on 28 joints? *Ann Rheum Dis* 2018;77:1736–41.
- Garrett S, Jenkinson T, Kennedy LG *et al.* A new approach to defining disease status in ankylosing spondylitis: the Bath Ankylosing Spondylitis Disease Activity Index. *J Rheumatol* 1994;21:2286–91.
- Lukas C, Landewe R, Sieper J *et al.* Development of an ASAS-endorsed disease activity score (ASDAS) in patients with ankylosing spondylitis. *Ann Rheum Dis* 2009;68:18–24.
- van der Heijde D, Dougados M, Landewe R *et al.* Sustained efficacy, safety and patient-reported outcomes of certolizumab pegol in axial spondyloarthritis: 4-year outcomes from RAPID-axSpA. *Rheumatology* 2017;56:1498–509.
- Machado PM, Landewé R, Heijde DV, Assessment of SpondyloArthritis International Society (ASAS). Ankylosing Spondylitis Disease Activity Score (ASDAS): 2018 update of the nomenclature for disease activity states. *Ann Rheum Dis* 2018;77:1539–40.
- Saber TP, Ng CT, Renard G *et al.* Remission in psoriatic arthritis: is it possible and how can it be predicted? *Arthritis Res Ther* 2010;12:R94.
- Challa DN, Kvrjic Z, Cheville AL *et al.* Patient-provider discordance between global assessments of disease activity in rheumatoid arthritis: a comprehensive clinical evaluation. *Arthritis Res Ther* 2017;19:212.
- Desthieux C, Granger B, Balanescu AR *et al.* Determinants of patient-physician discordance in global assessment in psoriatic arthritis: a Multicenter European Study. *Arthritis Care Res* 2017;69:1606–11.
- Howells L, Chisholm A, Cotterill S *et al.* Impact of disease severity, illness beliefs, and coping strategies on outcomes in psoriatic arthritis. *Arthritis Care Res* 2018; 70:295–302.
- Vander Cruyssen B, De Keyser F, Kruithof E, Mielants H, Van den Bosch F. Comparison of different outcome measures for psoriatic arthritis in patients treated with infliximab or placebo. *Ann Rheum Dis* 2006;66: 138–40.
